# Supplementary material for: What Was George Forrest’s Plant Collection Journey like in China?
Source: MDPI journal article supplement (doi:10.3390/plants13101367), 2024-05-15
Supplement: s1 [file s1]

### The list of species name after Forrest

| No. | Species Name                    | Publish Year |
|-----|---------------------------------|--------------|
| 1   | <i>Pleurogyne forrestii</i>     | 1907         |
| 2   | <i>Meconopsis forrestii</i>     | 1907         |
| 3   | <i>Primula forrestii</i>        | 1908         |
| 4   | <i>Iris forrestii</i>           | 1910         |
| 5   | <i>Aconitum forrestii</i>       | 1910         |
| 6   | <i>Pedicularis forrestiana</i>  | 1911         |
| 7   | <i>Codonopsis forrestii</i>     | 1912         |
| 8   | <i>Caryopteris forrestii</i>    | 1912         |
| 9   | <i>Chrysosplenium forrestii</i> | 1912         |
| 10  | <i>Cremanthodium forrestii</i>  | 1912         |
| 11  | <i>Linnaea forrestii</i>        | 1912         |
| 12  | <i>Abelia forrestii</i>         | 1912         |
| 13  | <i>Buddleja forrestii</i>       | 1912         |
| 14  | <i>Dumasia forrestii</i>        | 1912         |
| 15  | <i>Acer forrestii</i>           | 1912         |
| 16  | <i>Ajuga forrestii</i>          | 1912         |
| 17  | <i>Scutellaria forrestii</i>    | 1912         |
| 18  | <i>Galium forrestii</i>         | 1912         |
| 19  | <i>Leptodermis forrestii</i>    | 1912         |
| 20  | <i>Lespedeza forrestii</i>      | 1912         |
| 21  | <i>Strobilanthes forrestii</i>  | 1912         |
| 22  | <i>Rheum forrestii</i>          | 1912         |
| 23  | <i>Hemerocallis forrestii</i>   | 1912         |
| 24  | <i>Jurinea forrestii</i>        | 1912         |
| 25  | <i>Sedum forrestii</i>          | 1912         |
| 26  | <i>Habenaria forrestii</i>      | 1912         |
| 27  | <i>Arenaria forrestii</i>       | 1912         |
| 28  | <i>Delphinium forrestii</i>     | 1912         |
| 29  | <i>Allium forrestii</i>         | 1912         |
| 30  | <i>Veronica forrestii</i>       | 1912         |
| 31  | <i>Phlomis forrestii</i>        | 1912         |
| 32  | <i>Hedychium forrestii</i>      | 1912         |
| 33  | <i>Pleione forrestii</i>        | 1912         |
| 34  | <i>Saxifraga forrestii</i>      | 1912         |
| 35  | <i>Liparis forrestii</i>        | 1913         |
| 36  | <i>Periploca forrestii</i>      | 1913         |
| 37  | <i>Carex forrestii</i>          | 1913         |
| 38  | <i>Cynanchum forrestii</i>      | 1913         |
| 39  | <i>Pyrola forrestiana</i>       | 1913         |
| 40  | <i>Braya forrestii</i>          | 1913         |
| 41  | <i>Astragalus forrestii</i>     | 1913         |
| 42  | <i>Hemipilia forrestii</i>      | 1913         |
| 43  | <i>Parrya forrestii</i>         | 1914         |
| 44  | <i>Phyllanthus forrestii</i>    | 1914         |
| 45  | <i>Impatiens forrestii</i>      | 1915         |
| 46  | <i>Camellia forrestii</i>       | 1916         |
| 47  | <i>Dracocephalum forrestii</i>  | 1916         |

| No. | Species Name                                    | Publish Year |
|-----|-------------------------------------------------|--------------|
| 48  | <i>Oreocharis forrestii</i>                     | 1917         |
| 49  | <i>Rhamnella forrestii</i>                      | 1917         |
| 50  | <i>Pentapanax forrestii</i>                     | 1917         |
| 51  | <i>Lysionotus forrestii</i>                     | 1918         |
| 52  | <i>Abies forrestii</i>                          | 1919         |
| 53  | <i>Artemisia forrestii</i>                      | 1920         |
| 54  | <i>Podocarpus forrestii</i>                     | 1920         |
| 55  | <i>Omphalogramma forrestii</i>                  | 1920         |
| 56  | <i>Pseudotsuga forrestii</i>                    | 1920         |
| 57  | <i>Petrocosmea forrestii</i>                    | 1920         |
| 58  | <i>Phoebe forrestii</i>                         | 1921         |
| 59  | <i>Garuga forrestii</i>                         | 1921         |
| 60  | <i>Staphylea forrestii</i>                      | 1921         |
| 61  | <i>Parasenecio forrestii</i>                    | 1922         |
| 62  | <i>Tsuga forrestii</i>                          | 1923         |
| 63  | <i>Viola forrestiana</i>                        | 1923         |
| 64  | <i>Leontopodium forrestianum</i>                | 1925         |
| 65  | <i>Festuca forrestii</i>                        | 1927         |
| 66  | <i>Androsace forrestiana</i>                    | 1927         |
| 67  | <i>Chelonopsis forrestii</i>                    | 1927         |
| 68  | <i>Agapetes forrestii</i>                       | 1927         |
| 69  | <i>Microula forrestii</i>                       | 1928         |
| 70  | <i>Gentiana forrestii</i>                       | 1928         |
| 71  | <i>Serratula forrestii</i>                      | 1928         |
| 72  | <i>Manglietia forrestii</i>                     | 1928         |
| 73  | <i>Isodon forrestii</i>                         | 1929         |
| 74  | <i>Abies georgei</i> var. <i>smithii</i>        | 1929         |
| 75  | <i>Acronema forrestii</i>                       | 1930         |
| 76  | <i>Notopterygium forrestii</i>                  | 1930         |
| 77  | <i>Jurinea georgei</i>                          | 1933         |
| 78  | <i>Saxifraga georgei</i>                        | 1933         |
| 79  | <i>Abies georgei</i>                            | 1933         |
| 80  | <i>Ilex forrestii</i>                           | 1933         |
| 81  | <i>Ilex georgei</i>                             | 1933         |
| 82  | <i>Rubus forrestianus</i>                       | 1933         |
| 83  | <i>Vernonia forrestii</i>                       | 1933         |
| 84  | <i>Heracleum forrestii</i>                      | 1933         |
| 85  | <i>Rhodoleia forrestii</i>                      | 1933         |
| 86  | <i>Meconopsis georgei</i>                       | 1934         |
| 87  | <i>Oreocharis georgei</i>                       | 1934         |
| 88  | <i>Aconitum georgei</i>                         | 1934         |
| 89  | <i>Inula forrestii</i>                          | 1934         |
| 90  | <i>Chirita forrestii</i>                        | 1934         |
| 91  | <i>Diospyros forrestii</i>                      | 1934         |
| 92  | <i>Saussurea georgei</i>                        | 1934         |
| 93  | <i>Incarvillea forrestii</i>                    | 1935         |
| 94  | <i>Gentiana georgei</i>                         | 1936         |
| 95  | <i>Syzygium forrestii</i>                       | 1938         |
| 96  | <i>Ranunculus felixii</i> var. <i>forrestii</i> | 1939         |
| 97  | <i>Begonia forrestii</i>                        | 1939         |

| No. | Species Name                     | Publish Year |
|-----|----------------------------------|--------------|
| 98  | <i>Berberis forrestii</i>        | 1941         |
| 99  | <i>Abutilon forrestii</i>        | 1955         |
| 100 | <i>Taraxacum forrestii</i>       | 1961         |
| 101 | <i>Gueldenstaedtia forrestii</i> | 1962         |
| 102 | <i>Swertia forrestii</i>         | 1965         |
| 103 | <i>Rhodiola forrestii</i>        | 1965         |
| 104 | <i>Hypericum forrestii</i>       | 1970         |
| 105 | <i>Koenigia forrestii</i>        | 1973         |
| 106 | <i>Bulbophyllum forrestii</i>    | 1973         |
| 107 | <i>Actinodaphne forrestii</i>    | 1974         |
| 108 | <i>Roscoea forrestii</i>         | 1982         |
| 109 | <i>Daiswa forrestii</i>          | 1983         |
| 110 | <i>Maianthemum forrestii</i>     | 1986         |
| 111 | <i>Utricularia forrestii</i>     | 1986         |
| 112 | <i>Aristolochia forrestiana</i>  | 1989         |
| 113 | <i>Cypripedium forrestii</i>     | 1992         |
| 114 | <i>Allantodia forrestii</i>      | 1994         |
| 115 | <i>Tylophora forrestii</i>       | 1995         |
